# Supplementary material for: What was the impact of COVID-19 restrictions on unintentional injuries, in Canada and globally? A scoping review investigating how lockdown measures impacted the global burden of unintentional injury
Source: PubMed Central journal article supplement (PMC11180821; doi:10.3389/fpubh.2024.1385452), 2024-06-03
Supplement: Data_Sheet_1.pdf [file Data_Sheet_1.pdf]

1 Appendix A: Scoping Review Search Strategy

2 COVID Injury Search Report

3 Search Structure

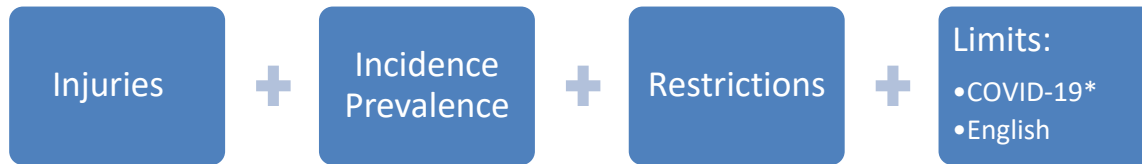

4

5 \*Wolters Kluwer COVID 19 Search Filter used: <https://tools.ovid.com/coronavirus/>

6 Search Results

| Database (Platform)            | Date Searched | Number of results |
|--------------------------------|---------------|-------------------|
| MEDLINE (Ovid)                 | July 22, 2021 | 886               |
| Embase (Ovid)                  | July 22, 2021 | 1132              |
| Web of Science Core Collection | July 22, 2021 | 982               |
| SPORTDiscus (EBSCO)            | July 22, 2021 | 41                |
|                                |               |                   |
| Total from database searches   | ---           | 3041              |

7

8 Search Strategies

9 MEDLINE

10 Ovid MEDLINE(R) and Epub Ahead of Print, In-Process, In-Data-Review & Other Non-Indexed Citations,  
11 Daily and Versions(R) <1946 to July 21, 2021>

12 1 "wounds and injuries"/ or exp abdominal injuries/ or accidental injuries/ or amputation, traumatic/ or  
 13 exp arm injuries/ or asphyxia/ or athletic injuries/ or exp back injuries/ or exp barotrauma/ or exp birth injuries/  
 14 or exp "bites and stings"/ or exp burns/ or exp cold injury/ or contrecoup injury/ or exp crush injuries/ or exp  
 15 joint dislocations/ or exp drowning/ or exp electric injuries/ or esophageal perforation/ or "extravasation of  
 16 diagnostic and therapeutic materials"/ or exp foreign bodies/ or exp fractures, bone/ or fractures, cartilage/ or  
 17 exp frostbite/ or exp hand injuries/ or exp heat stress disorders/ or exp hip injuries/ or lacerations/ or exp leg  
 18 injuries/ or microtrauma, physical/ or exp multiple trauma/ or nasal septal perforation/ or exp neck injuries/ or  
 19 occupational injuries/ or exp radiation injuries/ or reinjuries/ or retropneumoperitoneum/ or exp rupture/ or exp  
 20 shock, traumatic/ or exp shoulder injuries/ or exp soft tissue injuries/ or exp spinal cord injuries/ or exp  
 21 "sprains and strains"/ or exp tendon injuries/ or exp thoracic injuries/ or exp tooth injuries/ or exp trauma,  
 22 nervous system/ or tympanic membrane perforation/ or vascular system injuries/ or exp wounds,  
 23 nonpenetrating/ or exp wounds, penetrating/ 936409

24 2 accidents/ or exp accident prevention/ or accidental falls/ or accidents, aviation/ or exp biohazard  
 25 release/ or exp chemical hazard release/ or accidents, home/ or accidents, occupational/ or accidents, traffic/ or  
 26 exp radioactive hazard release/ 195098

27 3 (injur\* or accident\* or burn? or fire? or fall? or poison\* or drown\* or fracture? or trauma or collision?  
 28 or crashes or suffocat\*).tw,kf. 1655590

1 4 or/1-3 2147136  
2 5 incidence/ or prevalence/ or Epidemiology/ 577470  
3 6 (incidence or prevelan\* or epidemiolog\* or trend? or pattern? or occurrence or change?).tw,kf.  
4 5760350  
5 7 (increase? or decrease? or reduc\* or effect?).tw,kf. 11136589  
6 8 or/5-7 13868560  
7 9 4 and 8 1103617  
8 10 Quarantine/ 4965  
9 11 (lockdown? or restriction? or quarantine? or shelter or social distancing or physical distancing or  
10 confinement).tw,kf. 253149  
11 12 (stay\* adj2 home).tw,kw.2674  
12 13 or/10-12 256900  
13 14 4 and 8 and 13 9714  
14 15 limit 14 to covid 19 916  
15 16 limit 15 to english language 886

16 **Embase**

17 Embase <1974 to 2021 July 21>

18

19 1 injury/ or exp abdominal injury/ or exp abrasion/ or accidental injury/ or automutilation/ or exp  
20 avulsion injury/ or exp barotrauma/ or exp birth injury/ or exp "bites and stings"/ or exp blood vessel injury/ or  
21 exp blunt trauma/ or breast injury/ or exp burn/ or exp chemical injury/ or exp childhood injury/ or exp  
22 concussion/ or contrecoup injury/ or exp contusion/ or crush trauma/ or exp drowning/ or exp electric injury/ or  
23 exp erosion/ or exp foreign body/ or exp "head and neck injury"/ or exp heart injury/ or immune injury/ or  
24 immune mediated injury/ or exp injury scale/ or injury severity/ or exp limb injury/ or membrane damage/ or  
25 microtrauma/ or multiple trauma/ or exp musculoskeletal injury/ or exp nervous system injury/ or organ injury/  
26 or exp pelvis injury/ or exp perforation/ or prenatal injury/ or exp psychotrauma/ or exp radiation injury/ or exp  
27 reperfusion injury/ or exp respiratory tract injury/ or exp rupture/ or seatbelt injury/ or exp skin injury/ or exp  
28 soft tissue injury/ or sport injury/ or strangulation/ or surgical injury/ or exp thermal injury/ or exp thorax  
29 injury/ or tissue injury/ or exp tooth injury/ or traumatic amputation/ or traumatic hematoma/ or exp traumatic  
30 shock/ or trench foot/ or exp urogenital tract injury/ or volutrauma/ or exp wound/ 2306353

31 2 accident/ or aircraft accident/ or exp biological accident/ or exp chemical accident/ or destruction/ or  
32 exp disaster/ or electric accident/ or electrocution/ or explosion/ or falling/ or home accident/ or exp nuclear  
33 accident/ or exp occupational accident/ or radiation accident/ or structure collapse/ or traffic accident/ 207001

34 3 accident prevention/ 15828

1 4 (injur\* or accident\* or burn? or fire? or fall? or poison\* or drown\* or fracture? or trauma or collision?  
2 or crashes or suffocat\*).tw,kw. 2025852

3 5 or/1-4 3300591

4 6 incidence/ 460767

5 7 prevalence/ or epidemiology/ 992500

6 8 (incidence or prevelan\* or epidemiolog\* or trend? or pattern? or occurrence or change?).tw,kw.  
7 7335228

8 9 (increase? or decrease? or reduc\* or effect?).tw,kw. 13915670

9 10 or/6-9 17432385

10 11 5 and 10 1877547

11 12 home quarantine/ 1842

12 13 (lockdown? or restriction? or quarantine? or shelter or social distancing or physical distancing or  
13 confinement).tw,kw. 294670

14 14 (stay\* adj2 home).tw,kw.3203

15 15 or/12-14 298272

16 16 11 and 15 16475

17 17 limit 16 to covid-19 1153

18 18 limit 17 to english language 1132

19

20 **Web of Science Core Collection**

21 17  
22 **#8 AND #15 and English (Languages)**  
23 Edit  
24 Add to Search  
25 [982](#)

26 16  
27 **#8 AND #15**  
28 Edit  
29 Add to Search  
30 [1,016](#)

31 15  
32 **#9 OR #10 OR #11 OR #12 OR #13 OR #14**  
33 Edit  
34 Add to Search  
35 [164,875](#)

36 14  
37 **TS=((covid or covid19 or covid-19) and pandemic\*)**

1 Edit  
2 Add to Search  
3 [72,532](#)  
4 13  
5 **TS=((nouveau NEAR/2 CoV) or (nouveau NEAR/2 nCoV) or (nouveau NEAR/2 covid) or (nouveau**  
6 **NEAR/2 coronavirus\*) or (nouveau NEAR/2 corona virus) or (nouveau NEAR/2 Pandemi\*))**  
7 Edit  
8 Add to Search  
9 [2](#)  
10 12  
11 **TS=((new NEAR/2 CoV) or (new NEAR/2 nCoV) or (new NEAR/2 covid) or (new NEAR/2**  
12 **coronavirus\*) or (new NEAR/2 corona virus) or (new NEAR/2 Pandemi\*))**  
13 Edit  
14 Add to Search  
15 [5,381](#)  
16 11  
17 **TS=((novel NEAR/2 CoV) or (novel NEAR/2 nCoV) or (novel NEAR/2 covid) or (novel NEAR/2**  
18 **coronavirus\*) or (novel NEAR/2 corona virus) or (novel NEAR/2 Pandemi\*))**  
19 Edit  
20 Add to Search  
21 [10,996](#)  
22 10  
23 **TS=(2019-ncov or ncov19 or ncov-19 or 2019-novel CoV or sars-cov2 or sars-cov-2 or sarscov2 or**  
24 **sarscov-2 or Sars-coronavirus2 or Sars-coronavirus-2 or SARS-like coronavirus\* or coronavirus-19 or**  
25 **covid19 or covid-19 or covid 2019)**  
26 Edit  
27 Add to Search  
28 [153,911](#)  
29 9  
30 **TS=(coronavirus\* or corona virus\* or OC43 or NL63 OR 229E or HKU1 or HCoV\* or nvoc\* or covid\***  
31 **or sars-cov\* or sarscov\* or sars-coronavirus\* or severe acute respiratory syndrome coronavirus\*)**  
32 **Limited to date= 2019-01-01 to 2021-12-31**  
33 Edit  
34 Add to Search  
35 [162,859](#)  
36 8  
37 **#1 AND #4 AND #7**  
38 Edit  
39 Add to Search  
40 [22,231](#)  
41 7  
42 **#5 OR #6**  
43 Edit  
44 Add to Search  
45 [585,242](#)  
46 6  
47 **TS=(stay\* NEAR/2 home)**  
48 Edit  
49 Add to Search  
50 [4,031](#)  
51 5  
52 **TS=(lockdown\$ or restriction\$ or quarantine\$ or shelter or social distancing or physical distancing or**  
53 **confinement)**

|    |                                                                                                                                                   |                            |
|----|---------------------------------------------------------------------------------------------------------------------------------------------------|----------------------------|
| 1  | Edit                                                                                                                                              |                            |
| 2  | Add to Search                                                                                                                                     |                            |
| 3  |                                                                                                                                                   | <a href="#">582,147</a>    |
| 4  | 4                                                                                                                                                 |                            |
| 5  | <b>#2 OR #3</b>                                                                                                                                   |                            |
| 6  | Edit                                                                                                                                              |                            |
| 7  | Add to Search                                                                                                                                     |                            |
| 8  |                                                                                                                                                   | <a href="#">25,139,956</a> |
| 9  | 3                                                                                                                                                 |                            |
| 10 | <b>TS=(increase\$ or decrease\$ or reduc* or effect\$)</b>                                                                                        |                            |
| 11 | Edit                                                                                                                                              |                            |
| 12 | Add to Search                                                                                                                                     |                            |
| 13 |                                                                                                                                                   | <a href="#">20,212,996</a> |
| 14 | 2                                                                                                                                                 |                            |
| 15 | <b>TS=(incidence or prevelan* or epidemiolog* or trend\$ or pattern\$ or occurrence or change\$)</b>                                              |                            |
| 16 | Edit                                                                                                                                              |                            |
| 17 | Add to Search                                                                                                                                     |                            |
| 18 |                                                                                                                                                   | <a href="#">10,048,332</a> |
| 19 | 1                                                                                                                                                 |                            |
| 20 | <b>TS=(injur* or accident* or burn\$ or fire\$ or fall\$ or poison* or drown* or fracture\$ or trauma or collision\$ or crashes or suffocat*)</b> |                            |
| 21 | Edit                                                                                                                                              |                            |
| 22 | Add to Search                                                                                                                                     |                            |
| 23 |                                                                                                                                                   | <a href="#">2,982,434</a>  |
| 24 |                                                                                                                                                   |                            |
| 25 |                                                                                                                                                   |                            |

## 26 SPORTDiscus

| #   | Query                                                                                                                                                                                                                                                                                                                                                       | Limiters/Expanders            | Last Run Via                                                                                                    |
|-----|-------------------------------------------------------------------------------------------------------------------------------------------------------------------------------------------------------------------------------------------------------------------------------------------------------------------------------------------------------------|-------------------------------|-----------------------------------------------------------------------------------------------------------------|
| S19 | S4 AND S8 AND S11 AND S18                                                                                                                                                                                                                                                                                                                                   | Search modes - Boolean/Phrase | Interface - EBSCOhost Research Database - SPORTDiscus<br>Search Screen - Advanced Search Database - SPORTDiscus |
| S18 | S12 OR S13 OR S14 OR S15 OR S16 OR S17                                                                                                                                                                                                                                                                                                                      | Search modes - Boolean/Phrase | Interface - EBSCOhost Research Database - SPORTDiscus<br>Search Screen - Advanced Search Database - SPORTDiscus |
| S17 | TI ( ((covid or covid19 or covid-19) and pandemic* ) OR AB ( ((covid or covid19 or covid-19) and pandemic* ) OR KW ( ((covid or covid19 or covid-19) and pandemic* ) )                                                                                                                                                                                      | Search modes - Boolean/Phrase | Interface - EBSCOhost Research Database - SPORTDiscus<br>Search Screen - Advanced Search Database - SPORTDiscus |
| S16 | TI ( ((nouveau N2 CoV) or (nouveau N2 nCoV) or (nouveau N2 covid) or (nouveau N2 coronavirus*) or (nouveau N2 corona virus) or (nouveau N2 Pandemi*)) ) OR AB ( ((nouveau N2 CoV) or (nouveau N2 nCoV) or (nouveau N2 covid) or (nouveau N2 coronavirus*) or (nouveau N2 corona virus) or (nouveau N2 Pandemi*)) ) OR KW ( ((nouveau N2 CoV) or (nouveau N2 | Search modes - Boolean/Phrase | Interface - EBSCOhost Research Database - SPORTDiscus<br>Search Screen - Advanced Search Database - SPORTDiscus |

|     |                                                                                                                                                                                                                                                                                                                                                                                                                                                                                                                                                                                                                                                                                                                                  |                               |                                                                                                   |
|-----|----------------------------------------------------------------------------------------------------------------------------------------------------------------------------------------------------------------------------------------------------------------------------------------------------------------------------------------------------------------------------------------------------------------------------------------------------------------------------------------------------------------------------------------------------------------------------------------------------------------------------------------------------------------------------------------------------------------------------------|-------------------------------|---------------------------------------------------------------------------------------------------|
| S15 | <p>nCoV) or (nouveau N2 covid) or (nouveau N2 coronavirus*) or (nouveau N2 corona virus) or (nouveau N2 Pandemi*)) )</p> <p>TI ( ((new N2 CoV) or (new N2 nCoV) or (new N2 covid) or (new N2 coronavirus*) or (new N2 corona virus) or (new N2 Pandemi*)) ) OR AB ( ((new N2 CoV) or (new N2 nCoV) or (new N2 covid) or (new N2 coronavirus*) or (new N2 corona virus) or (new N2 Pandemi*)) ) OR KW ( ((new N2 CoV) or (new N2 nCoV) or (new N2 covid) or (new N2 coronavirus*) or (new N2 corona virus) or (new N2 Pandemi*)) )</p>                                                                                                                                                                                            | Search modes - Boolean/Phrase | Interface - EBSCOhost Research Database<br>Search Screen - Advanced Search Database - SPORTDiscus |
| S14 | <p>TI ( ((novel N2 CoV) or (novel N2 nCoV) or (novel N2 covid) or (novel N2 coronavirus*) or (novel N2 corona virus) or (novel N2 Pandemi*)) ) OR AB ( ((novel N2 CoV) or (novel N2 nCoV) or (novel N2 covid) or (novel N2 coronavirus*) or (novel N2 corona virus) or (novel N2 Pandemi*)) ) OR KW ( ((novel N2 CoV) or (novel N2 nCoV) or (novel N2 covid) or (novel N2 coronavirus*) or (novel N2 corona virus) or (novel N2 Pandemi*)) )</p>                                                                                                                                                                                                                                                                                 | Search modes - Boolean/Phrase | Interface - EBSCOhost Research Database<br>Search Screen - Advanced Search Database - SPORTDiscus |
| S13 | <p>(DE "COVID-19" OR DE "COVID-19 pandemic") OR TI ( (2019-ncov or ncov19 or ncov-19 or 2019-novel CoV or sars-cov2 or sars-cov-2 or sarscov2 or sarscov-2 or Sars-coronavirus2 or Sars-coronavirus-2 or SARS-like coronavirus* or coronavirus-19 or covid19 or covid-19 or covid 2019) ) OR AB ( (2019-ncov or ncov19 or ncov-19 or 2019-novel CoV or sars-cov2 or sars-cov-2 or sarscov2 or sarscov-2 or Sars-coronavirus2 or Sars-coronavirus-2 or SARS-like coronavirus* or coronavirus-19 or covid19 or covid-19 or covid 2019) ) OR KW ( (2019-ncov or ncov19 or ncov-19 or 2019-novel CoV or sars-cov2 or sars-cov-2 or sarscov2 or sarscov-2 or Sars-coronavirus2 or Sars-coronavirus-2 or SARS-like coronavirus* or</p> | Search modes - Boolean/Phrase | Interface - EBSCOhost Research Database<br>Search Screen - Advanced Search Database - SPORTDiscus |

|     |                                                                                                                                                                                                                                                                                                                                                                                                                                                                                                                                                                                                                   |                                                                               |                                                                                          |
|-----|-------------------------------------------------------------------------------------------------------------------------------------------------------------------------------------------------------------------------------------------------------------------------------------------------------------------------------------------------------------------------------------------------------------------------------------------------------------------------------------------------------------------------------------------------------------------------------------------------------------------|-------------------------------------------------------------------------------|------------------------------------------------------------------------------------------|
|     | coronavirus-19 or covid19 or covid-19 or covid 2019) )                                                                                                                                                                                                                                                                                                                                                                                                                                                                                                                                                            |                                                                               |                                                                                          |
|     | TI ( (coronavirus* or corona virus* or OC43 or NL63 OR 229E or HKU1 or HCoV* or nvoc* or covid* or sars-cov* or sarscov* or sars-coronavirus* or severe acute respiratory syndrome coronavirus* ) ) OR AB ( (coronavirus* or corona virus* or OC43 or NL63 OR 229E or HKU1 or HCoV* or nvoc* or covid* or sars-cov* or sarscov* or sars-coronavirus* or severe acute respiratory syndrome coronavirus* ) ) OR KW ( (coronavirus* or corona virus* or OC43 or NL63 OR 229E or HKU1 or HCoV* or nvoc* or covid* or sars-cov* or sarscov* or sars-coronavirus* or severe acute respiratory syndrome coronavirus* ) ) | Limiters - Published Date: 20190101-20211231<br>Search modes - Boolean/Phrase | Interface - EBSCOhost Research Database - SPORTDiscus<br>Search Screen - Advanced Search |
| S12 |                                                                                                                                                                                                                                                                                                                                                                                                                                                                                                                                                                                                                   |                                                                               |                                                                                          |
| S11 | S9 OR S10                                                                                                                                                                                                                                                                                                                                                                                                                                                                                                                                                                                                         | Search modes - Boolean/Phrase                                                 | Interface - EBSCOhost Research Database - SPORTDiscus<br>Search Screen - Advanced Search |
| S10 | TI (stay* N2 home) OR AB (stay* N2 home) OR KW (stay* N2 home)                                                                                                                                                                                                                                                                                                                                                                                                                                                                                                                                                    | Search modes - Boolean/Phrase                                                 | Interface - EBSCOhost Research Database - SPORTDiscus<br>Search Screen - Advanced Search |
|     | (DE "STAY-at-home orders") OR TI ( (lockdown# or restriction# or quarantine# or shelter or social distancing or physical distancing or confinement) ) OR AB ( (lockdown# or restriction# or quarantine# or shelter or social distancing or physical distancing or confinement) ) OR KW ( (lockdown# or restriction# or quarantine# or shelter or social distancing or physical distancing or confinement) )                                                                                                                                                                                                       | Search modes - Boolean/Phrase                                                 | Interface - EBSCOhost Research Database - SPORTDiscus<br>Search Screen - Advanced Search |
| S9  |                                                                                                                                                                                                                                                                                                                                                                                                                                                                                                                                                                                                                   |                                                                               |                                                                                          |
| S8  | S5 OR S6 OR S7                                                                                                                                                                                                                                                                                                                                                                                                                                                                                                                                                                                                    | Search modes - Boolean/Phrase                                                 | Interface - EBSCOhost Research Database - SPORTDiscus<br>Search Screen - Advanced Search |
|     | TI ( (increase# or decrease# or reduc* or effect#) ) OR AB ( (increase# or decrease# or reduc* or effect#) ) OR KW ( (increase# or decrease# or reduc* or effect#) )                                                                                                                                                                                                                                                                                                                                                                                                                                              | Search modes - Boolean/Phrase                                                 | Interface - EBSCOhost Research Database - SPORTDiscus<br>Search Screen - Advanced Search |
| S7  |                                                                                                                                                                                                                                                                                                                                                                                                                                                                                                                                                                                                                   |                                                                               |                                                                                          |
| S6  | TI ( (incidence or prevelan* or epidemiolog* or trend# or pattern# or occurrence or change#) ) OR AB ( (incidence or prevelan* or                                                                                                                                                                                                                                                                                                                                                                                                                                                                                 | Search modes - Boolean/Phrase                                                 | Interface - EBSCOhost Research Database - SPORTDiscus<br>Search Screen - Advanced Search |

|    |                                                                                                                                                                                                                                                                                                                                                                                                                                                                                          |                               |                                                                                               |
|----|------------------------------------------------------------------------------------------------------------------------------------------------------------------------------------------------------------------------------------------------------------------------------------------------------------------------------------------------------------------------------------------------------------------------------------------------------------------------------------------|-------------------------------|-----------------------------------------------------------------------------------------------|
|    | epidemiolog* or trend# or pattern#<br>or occurrence or change#) ) OR KW<br>( (incidence or prevelan* or<br>epidemiolog* or trend# or pattern#<br>or occurrence or change#) )                                                                                                                                                                                                                                                                                                             |                               |                                                                                               |
| S5 | DE "DISEASE prevalence" OR DE<br>"EPIDEMIOLOGY"                                                                                                                                                                                                                                                                                                                                                                                                                                          | Search modes - Boolean/Phrase | Interface - EBSCOhost Research D<br>Search Screen - Advanced Search<br>Database - SPORTDiscus |
| S4 | S1 OR S2 OR S3                                                                                                                                                                                                                                                                                                                                                                                                                                                                           | Search modes - Boolean/Phrase | Interface - EBSCOhost Research D<br>Search Screen - Advanced Search<br>Database - SPORTDiscus |
| S3 | TI ( (injur* or accident* or burn# or<br>fire# or fall# or poison* or drown* or<br>fracture# or trauma or collision# or<br>crashes or suffocat*) ) OR AB ( (injur* or accident* or burn# or fire#<br>or fall# or poison* or drown* or<br>fracture# or trauma or collision# or<br>crashes or suffocat*) ) OR KW ( (injur* or accident* or burn# or fire#<br>or fall# or poison* or drown* or<br>fracture# or trauma or collision# or<br>crashes or suffocat*) )                           | Search modes - Boolean/Phrase | Interface - EBSCOhost Research D<br>Search Screen - Advanced Search<br>Database - SPORTDiscus |
| S2 | DE "ACCIDENTS" OR DE<br>"ACCIDENTAL falls" OR DE<br>"CAVING accidents" OR DE<br>"CRASH injuries" OR DE<br>"DROWNING" OR DE "HUNTING<br>accidents" OR DE "ICE accidents"<br>OR DE "MARINE accidents" OR<br>DE "MEDICAL emergencies" OR<br>DE "MOUNTAINEERING<br>accidents" OR DE "OVERUSE<br>injuries" OR DE "SKIING accidents"<br>OR DE "SPORTS accidents"                                                                                                                               | Search modes - Boolean/Phrase | Interface - EBSCOhost Research D<br>Search Screen - Advanced Search<br>Database - SPORTDiscus |
| S1 | DE "WOUNDS & injuries" OR DE<br>"BACKPACKING injuries" OR DE<br>"BLUNT trauma" OR DE "BURNS<br>& scalds" OR DE "CAMPING<br>injuries" OR DE "CHRONIC<br>wounds & injuries" OR DE "CRASH<br>injuries" OR DE "DANCING<br>injuries" OR DE<br>"DECOMPRESSION sickness" OR<br>DE "DISABILITIES" OR DE<br>"HEAD injuries" OR DE "JOINT<br>dislocations" OR DE "MARTIAL<br>arts injuries" OR DE<br>"MOTORCYCLING injuries" OR<br>DE "MOUNTAINEERING injuries"<br>OR DE "NERVOUS system injuries" | Search modes - Boolean/Phrase | Interface - EBSCOhost Research D<br>Search Screen - Advanced Search<br>Database - SPORTDiscus |



OR DE "ORGAN rupture" OR DE  
"OVEREXERTION injuries" OR DE  
"OVERUSE injuries" OR DE  
"PENETRATING wounds" OR DE  
"PHYSIOLOGIC strain" OR DE  
"SOFT tissue injuries" OR DE  
"SPORTS injuries" OR DE  
"SUBLUXATION" OR DE  
"WOUND care"

1

2
